# Supplementary material for: First-in-human autologous oral mucosal epithelial sheet transplantation to prevent anastomotic re-stenosis in congenital esophageal atresia
Source: medRxiv preprint, doi:10.1101/2021.08.15.21262092, version 1 (2021-08-23)
Supplement: Supplemental Table 1 [file 262092_file07.docx]

| Observation/evaluation date | | Before treatment | Cell collection | Operation date | Day 1 after operation | Week 1 | Week 3 | Week 4 | Week 12 | Week 24 | Week 36 | Week 48 | Termination |
| --- | --- | --- | --- | --- | --- | --- | --- | --- | --- | --- | --- | --- | --- |
| Acceptable advance/delay in schedule | | 4 weeks in advance of operation date | 2 weeks in advance of operation date | 0 days | 1 day | ±2 days | ±1 week | ±1 week | ±4 weeks | ±4 weeks | ±4 weeks | ±4 weeks | - |
| Informed consent | | ○, ○  (Collection) | | ○  (Transplantation) |  |  |  |  |  |  |  |  |  |
| Collection of blood and oral mucosa | |  | ○ |  |  |  |  |  |  |  |  |  |  |
| Clinical condition (general) | Vital signs | ○ | | ○ | ○ | ○ | ○ | ○ | ○ | ○ | ○ | ○ | ○ |
| Clinical condition (stenosis) | Difficulty in swallowing, food stuck | ○ | | ○ | ○ | ○ | ○ | ○ | ○ | ○ | ○ | ○ | ○ |
| Clinical examination | Blood test | ○ | |  |  | ○ | (○) | ○ | ○ |  |  | ○ | ○ |
| X-ray | ○ | |  |  | ○ |  | ○ | ○ |  |  | ○ | ○ |
| Endoscopic examination | Presence of stenosis | ○ | | ○ |  | ○ |  | ○ | ○ |  |  | ○ | ○ |
| Sheet fixing, epithelialization |  | | ○ |  | ○ |  | ○ | ○ |  |  | ○ | ○ |
| Esophagography | Presence of stenosis | ○ | |  |  |  |  | ○ | ○ |  |  | ○ | ○ |
| Safety | Adverse event |  | | | | | | | | | | | |

Supplemental Table 1. Inspection items performed for epithelial cell sheet transplantation and their timing
